# Supplementary material for: One-pot synthesis of a nitrogen and phosphorus-dual-doped carbon nanotube array as a highly effective electrocatalyst for the oxygen reduction reaction
Source: Royal Society of Chemistry journal article supplement (doi:10.1039/c4ta02427c), 2014-01-01
Supplement: c4ta02427c1.pdf [file c4ta02427c1.pdf]

## Supporting Information

### One-pot synthesis of nitrogen and phosphorus-dual-doped carbon nanotube array as highly effective electrocatalyst for oxygen reduction reaction

Jinliang Zhu<sup>a</sup>, San Ping Jiang<sup>\*,b</sup>, Ruihong Wang<sup>c</sup>, Keying Shi<sup>c</sup> and Pei Kang Shen<sup>\*,a</sup>

<sup>a</sup> State Key Laboratory of Optoelectronic Materials and Technologies, and Key Laboratory of Low-carbon Chemistry & Energy Conservation of Guangdong Province, School of Physics and Engineering, Sun Yat-sen University, 135 Xingang Road, Guangzhou, 510275, PR China

<sup>b</sup> Fuels and Energy Technology Institute & Department of Chemical Engineering, Curtin University, Perth, WA6102, Australia.

<sup>c</sup> Key Laboratory of Functional Inorganic Material Chemistry, Ministry of Education of the People's Republic of China, Heilongjiang University, Harbin, 150080, P. R. China.

#### Additional data:

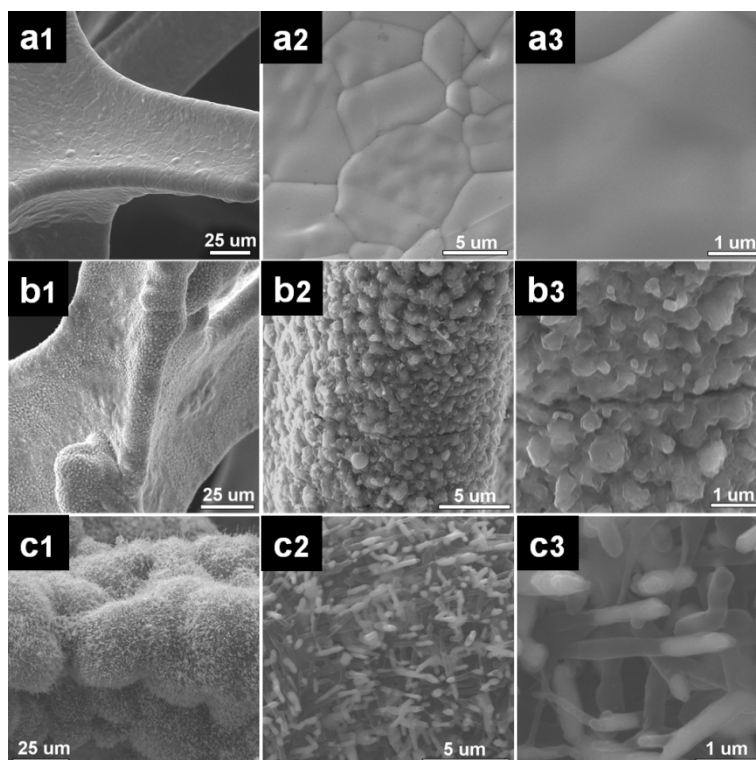

**Fig. S1** SEM images of growing N, P-CNTs at different stages. (a1-a3, initial Ni foam substrate, b1-b3, Ni foam at 850 °C for 1 min, c1-c3, Ni foam at 850 °C for 15 min)

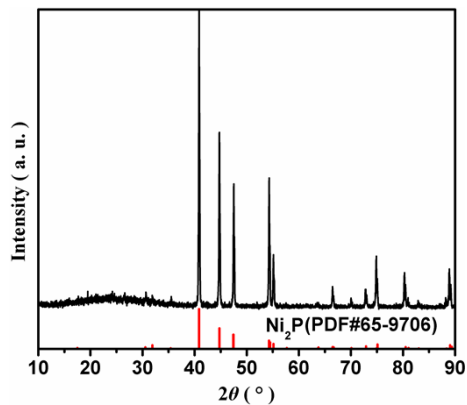

**Fig. S2** XRD pattern of the products collected in the second stage (1 min at 850 °C). It confirms the formation of Ni<sub>2</sub>P.

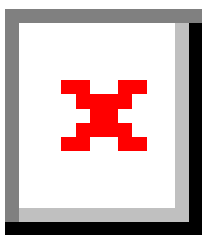

**Fig. S3** SEM (side view) image of the N, P-CNTs.

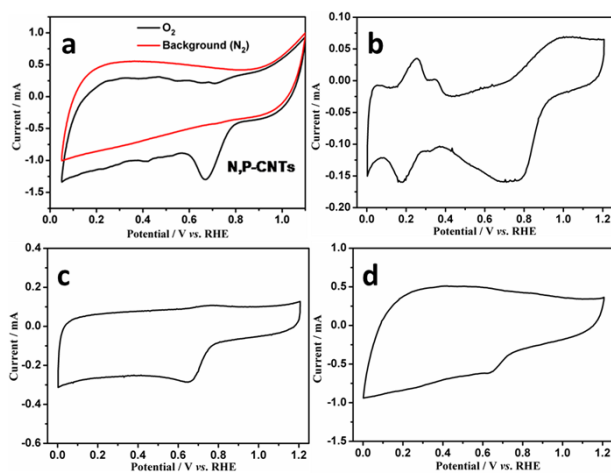

**Fig. S4** (a) CV curves of the N, P-CNTs in N<sub>2</sub>-saturated and O<sub>2</sub>-saturated 0.1 mol L<sup>-1</sup> KOH, and (b-d) CV curves of the Pt/C (b), CNTs (c) and N-CNTs (d) in O<sub>2</sub>-saturated 0.1 mol L<sup>-1</sup> KOH with a sweep rate of 50 mV s<sup>-1</sup>.
